# Supplementary figures and images for: Differential Transcriptional Activation of Genes Encoding Soluble Methane Monooxygenase in a Facultative Versus an Obligate Methanotroph
Source: MDPI journal article supplement (doi:10.3390/microorganisms6010020), 2018-03-06

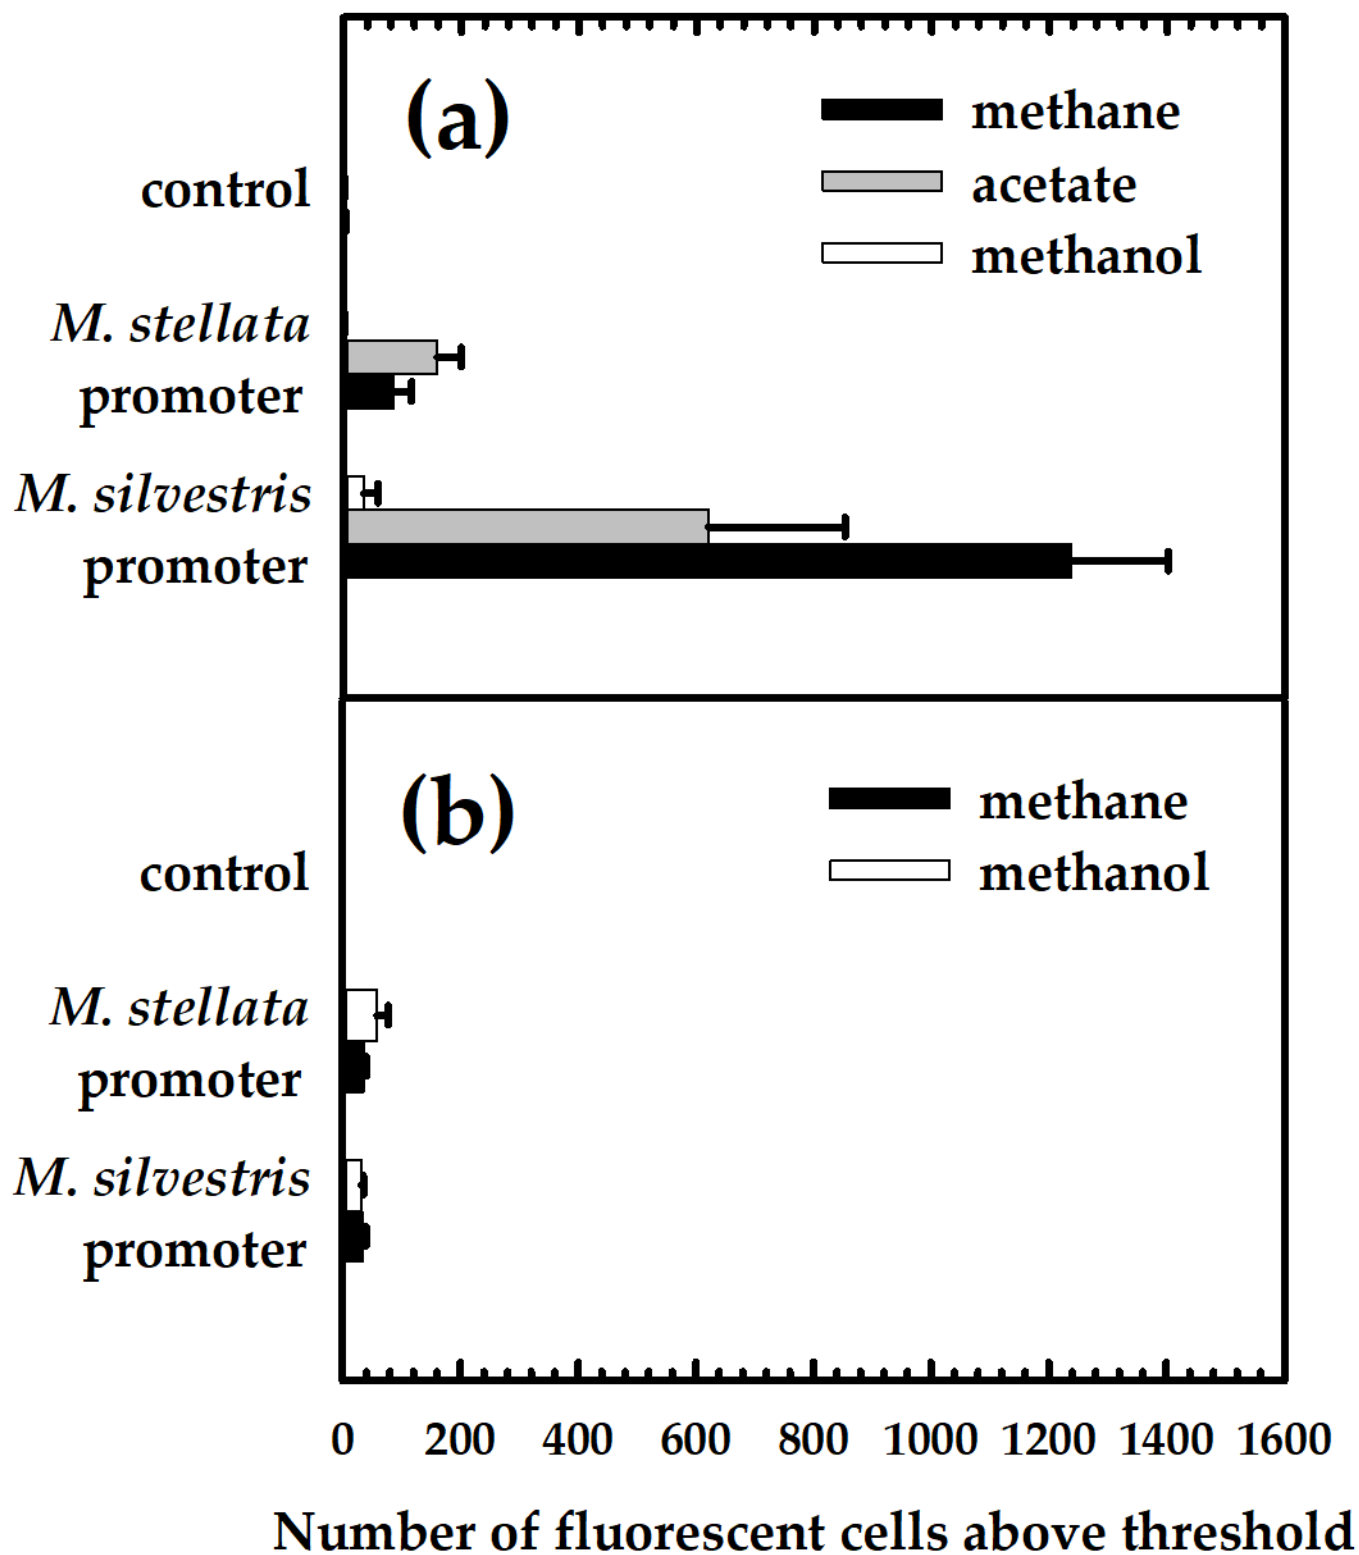

Supplement: s1 [file s1]

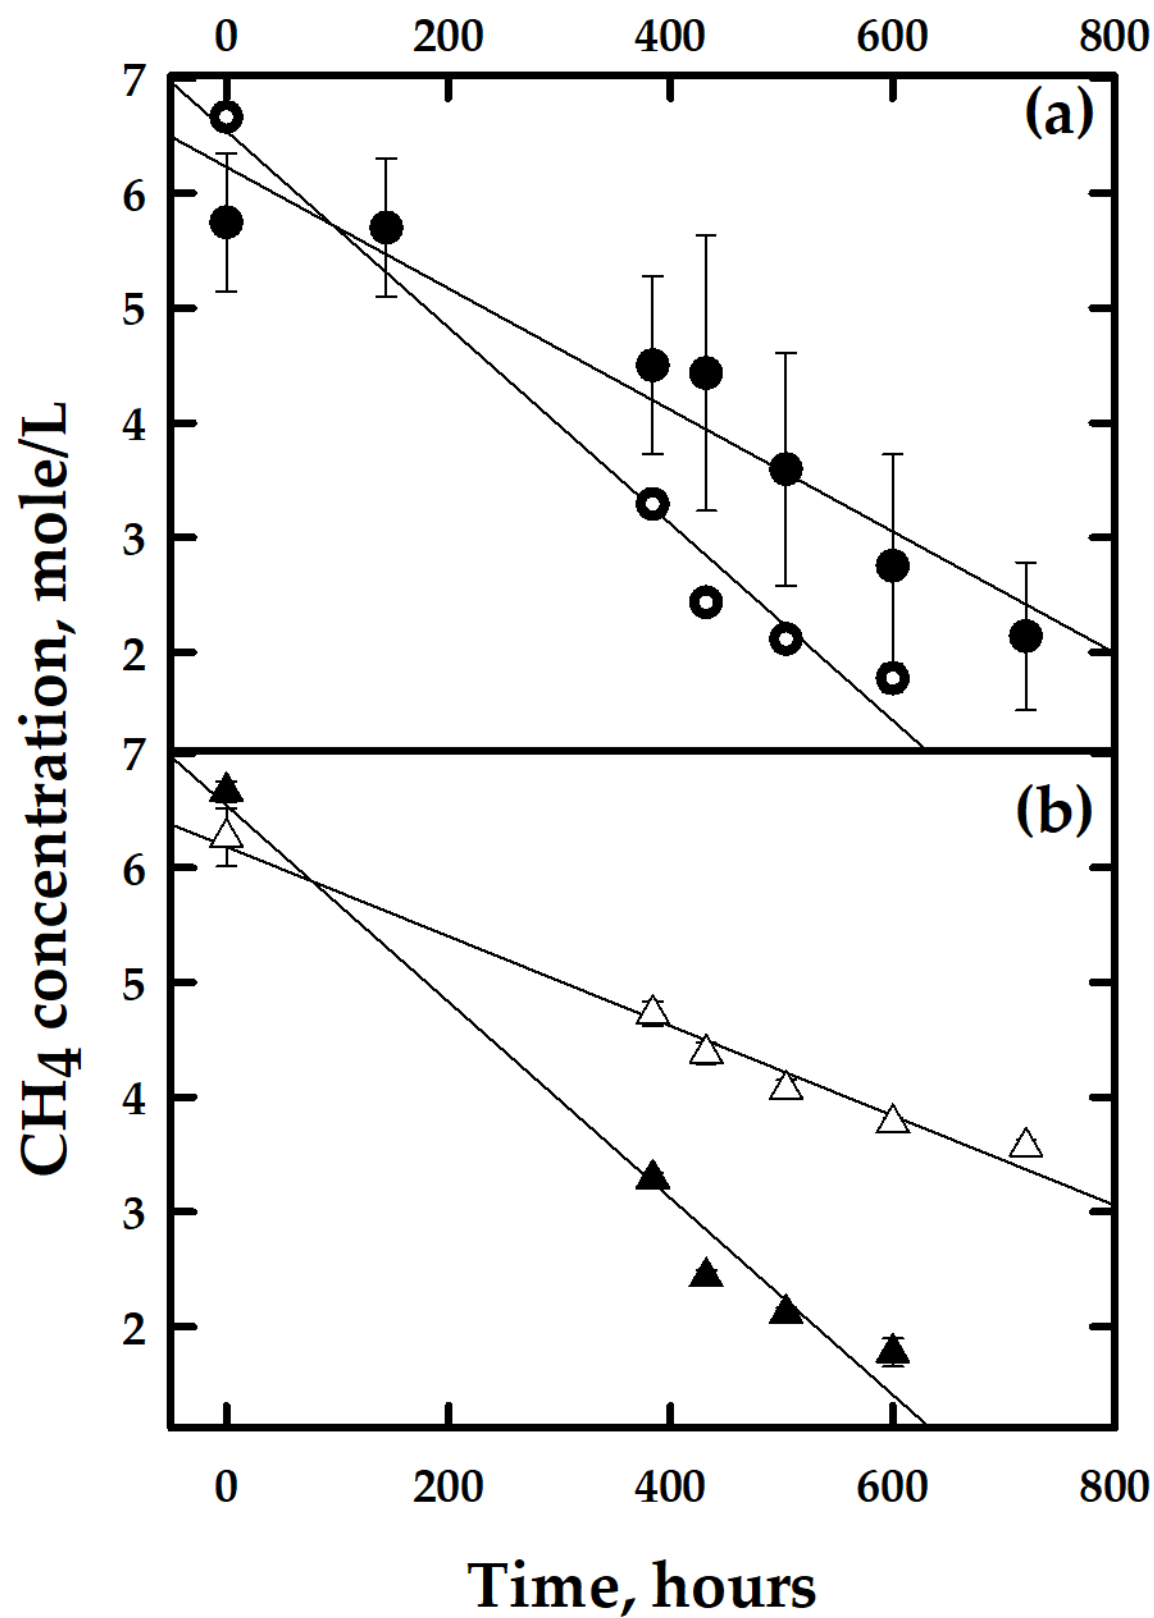

Supplement: s1 [file s1]

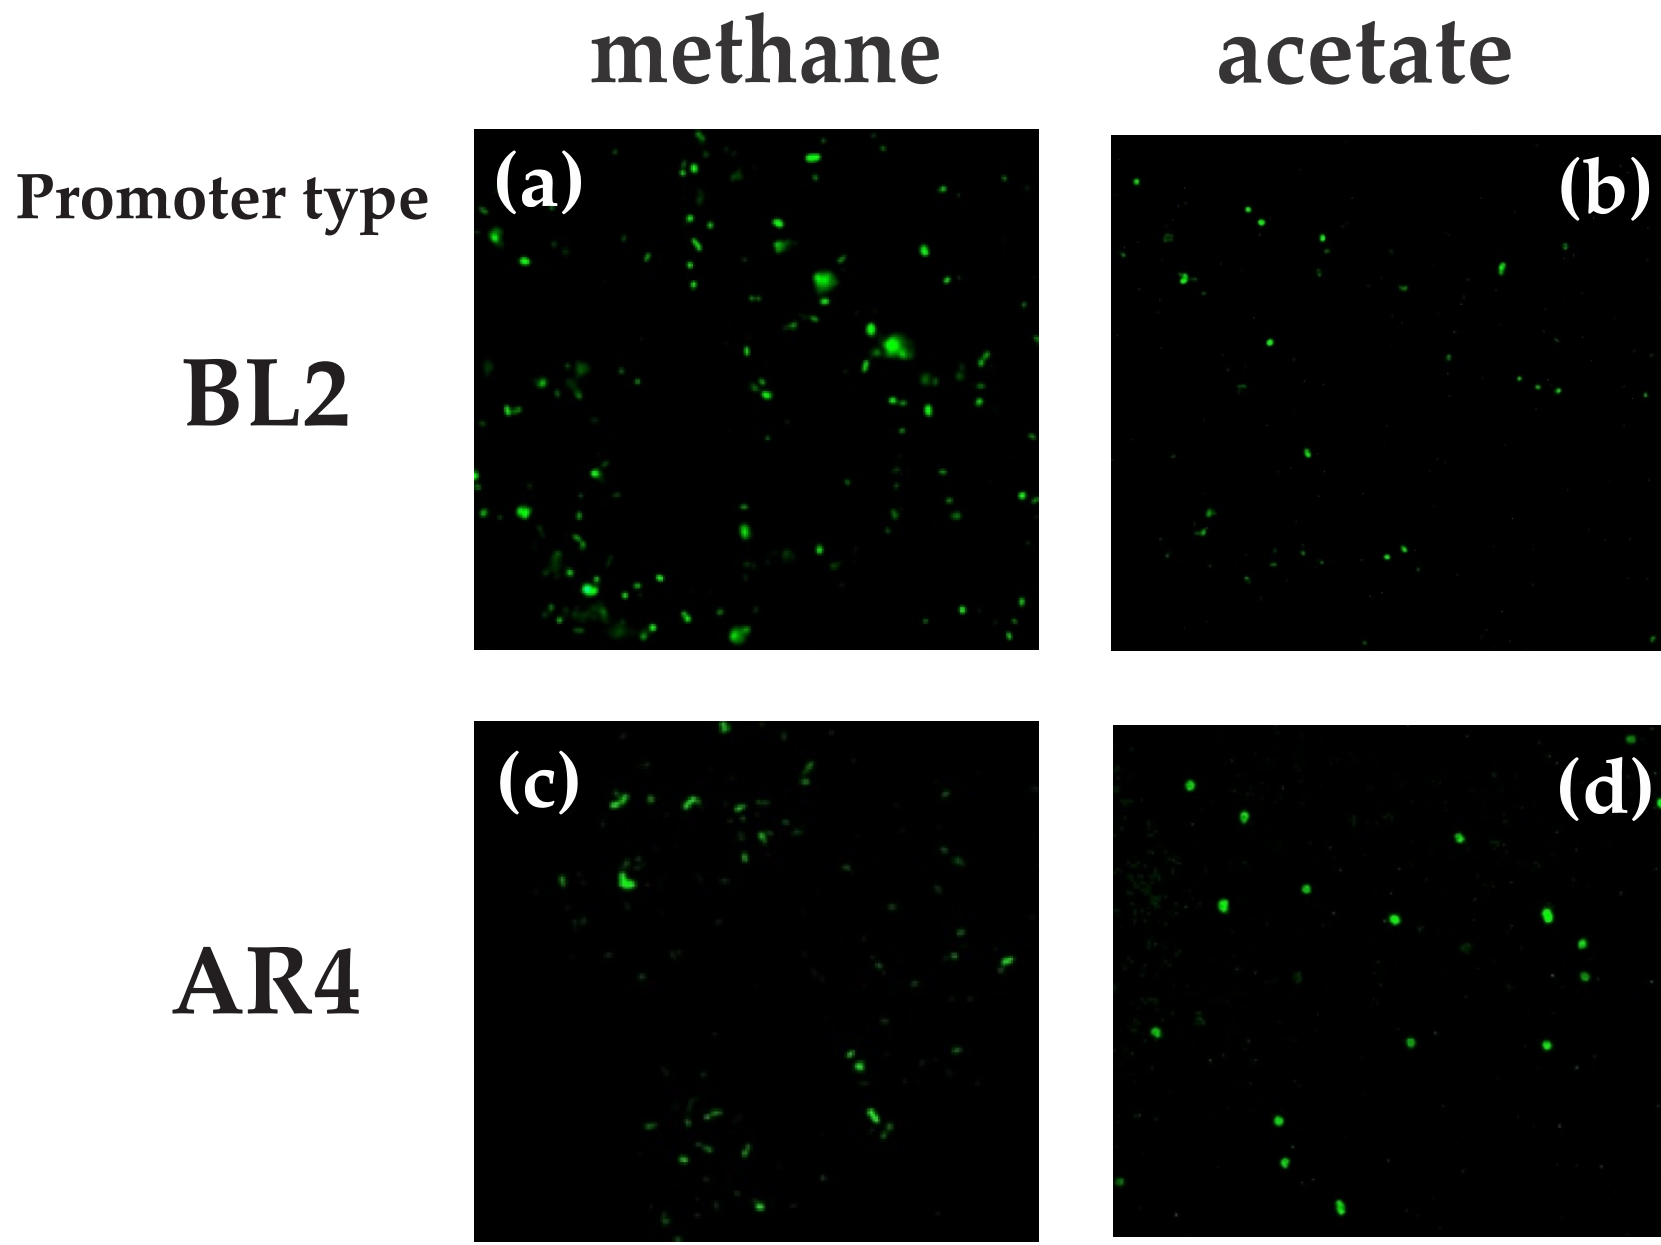

Promoter activity in  
*Methylocella silvestris* BL2

Supplement: s1 [file s1]
